# Supplementary material for: Incidence and pattern of urgent revascularization in acute coronary syndromes treated with ticagrelor or prasugrel
Source: Springer Nature journal article supplement (doi:10.1007/s00392-024-02454-x), 2024-05-13
Supplement: MOESM1 [file 27084262]

## SUPPLEMENTAL APPENDIX

### Incidence and pattern of urgent revascularization in acute coronary syndromes treated with ticagrelor or prasugrel

#### **This online supplement contains the following items:**

|                                                                                                                                                                         |   |
|-------------------------------------------------------------------------------------------------------------------------------------------------------------------------|---|
| Supplemental Table 1. Clinical outcomes as per assigned antiplatelet therapy.....                                                                                       | 2 |
| Supplemental Table 2. Drug therapy at discharge and subsequent antithrombotic medications after discontinuation of assigned antiplatelet therapy.                       | 3 |
| Supplemental Table 3. Baseline, angiographic characteristics and drug therapy at discharge in patients treated conservatively as per assigned antiplatelet therapy..... | 4 |
| Supplemental Table 4. Clinical outcomes in patients treated conservatively as per assigned antiplatelet therapy.                                                        | 6 |
| Supplemental Table 5. Clinical outcomes in patients as per assigned antiplatelet therapy using on-treatment analysis.                                                   | 7 |
| Supplemental Figure 1. Compliance with the assigned antiplatelet therapy at different time points of the follow-up.                                                     | 8 |
| Supplemental Figure 2. One-month landmark analysis of urgent revascularization following PCI. ..                                                                        | 9 |

Supplemental Table 1. Clinical outcomes as per assigned antiplatelet therapy.

| Characteristic                                                        | Ticagrelor<br>(N=1,676) | Prasugrel<br>(N=1,701) | Hazard Ratio<br>(95% CI) | p value |
|-----------------------------------------------------------------------|-------------------------|------------------------|--------------------------|---------|
| <b>Composite of death, myocardial infarction, or stroke – no. (%)</b> | 162 (9.8)               | 120 (7.1)              | 1.41 [1.11-1.80]         | 0.005   |
| <b>Death from any cause</b>                                           | 79 (4.8)                | 64 (3.8)               | 1.28 [0.92-1.77]         | 0.147   |
| <i>Cardiovascular</i>                                                 | 54                      | 52                     |                          |         |
| <i>Noncardiovascular</i>                                              | 25                      | 12                     |                          |         |
| <b>Myocardial Infarction</b>                                          | 88 (5.3)                | 55 (3.3)               | 1.67 [1.19-2.34]         | 0.003   |
| <i>Type 1</i>                                                         | 45                      | 31                     |                          |         |
| <i>Type 2</i>                                                         | 3                       | 3                      |                          |         |
| <i>Type 4a</i>                                                        | 19                      | 10                     |                          |         |
| <i>Type 4b</i>                                                        | 20                      | 11                     |                          |         |
| <i>Type 5</i>                                                         | 1                       | 0                      |                          |         |
| <b>ST-elevation myocardial infarction</b>                             | 29                      | 12                     |                          |         |
| <b>Stroke</b>                                                         | 16 (1.0)                | 14 (0.8)               | 1.20 [0.58-2.46]         | 0.621   |
| <i>Ischemic</i>                                                       | 11                      | 12                     |                          |         |
| <i>Hemorrhagic</i>                                                    | 5                       | 2                      |                          |         |
| <b>Definite or probable stent thrombosis</b>                          | 25 (1.5)                | 20 (1.2)               | 1.28 [0.71-2.30]         | 0.413   |
| <b>Definite stent thrombosis</b>                                      | 21 (1.3)                | 12 (0.7)               | 1.81 [0.89-3.68]         | 0.101   |
| <b>BARC type 3 to 5 bleeding</b>                                      | 100 (6.0)               | 95 (5.6)               | 1.08 [0.82-1.43]         | 0.586   |
| <i>BARC 3a</i>                                                        | 52                      | 48                     |                          |         |
| <i>BARC 3b</i>                                                        | 33                      | 37                     |                          |         |
| <i>BARC 3c</i>                                                        | 6                       | 2                      |                          |         |
| <i>BARC 4</i>                                                         | 2                       | 4                      |                          |         |
| <i>BARC 5a</i>                                                        | 1                       | 0                      |                          |         |
| <i>BARC 5b</i>                                                        | 6                       | 4                      |                          |         |

Data are number of events with Kaplan-Meier estimates (%) or cumulative incidence (%) after accounting for competing risk at 12-month follow-up. BARC type 3 to 5 bleeding was evaluated in the intention-to-treat population. BARC=Bleeding Academic Research Consortium; CI=confidence interval.

**Supplemental Table 2. Drug therapy at discharge and subsequent antithrombotic medications after discontinuation of assigned antiplatelet therapy.**

| <b>Characteristic*</b>                                     | <b>All<br/>(N=3,372)</b> | <b>Ticagrelor<br/>(N=1,673)</b> | <b>Prasugrel<br/>(N=1,699)</b> | <b>p value</b> |
|------------------------------------------------------------|--------------------------|---------------------------------|--------------------------------|----------------|
| <b>Final diagnosis of acute coronary syndrome– no. (%)</b> | 3,364 (99.8)             | 1,669 (99.8)                    | 1,695 (99.8)                   | >0.999         |
| <i>Unstable angina</i>                                     | 261/3,364 (7.8)          | 132/1,669 (7.9)                 | 129/1,695 (7.6)                |                |
| <i>NSTEMI</i>                                              | 1,509/3,364 (44.9)       | 747/1,669 (44.8)                | 762/1,695 (45.0)               |                |
| <i>STEMI</i>                                               | 1,594/3,364 (47.4)       | 790/1,669 (47.3)                | 804/1,695 (47.4)               |                |
| <b>Therapy at discharge – no. (%) †</b>                    |                          |                                 |                                |                |
| <i>Aspirin</i>                                             | 3,260/3,317 (98.3)       | 1,610/1,642 (98.1)              | 1,650/1,675 (98.5)             | 0.380          |
| <i>Ticagrelor</i>                                          | 1,538/3,317 (46.4)       | 1,527/1,642 (93.0)              | 11/1,675 (0.7)                 | <0.001         |
| <i>Prasugrel</i>                                           | 1,562/3,317 (47.1)       | 19/1,642 (1.2)                  | 1,543/1,675 (92.1)             | <0.001         |
| <i>Clopidogrel</i>                                         | 183/3,317 (5.5)          | 75/1,642 (4.6)                  | 108/1,675 (6.5)                | 0.022          |
| <i>Oral anticoagulant drugs</i>                            | 146/3,317 (4.4)          | 67/1,642 (4.1)                  | 79/1,675 (4.7)                 | 0.419          |
| <i>Beta blocking agents</i>                                | 2,875/3,317 (86.7)       | 1,430/1,642 (87.1)              | 1,445/1,675 (86.3)             | 0.520          |
| <i>ACE inhibitor/ARB</i>                                   | 2,889/3,317 (87.1)       | 1,417/1,642 (86.3)              | 1,472/1,675 (87.9)             | 0.191          |
| <i>Statin</i>                                              | 3,161/3,317 (95.3)       | 1,564/1,642 (95.2)              | 1,597/1,675 (95.3)             | 0.964          |
| <b>Characteristic**</b>                                    | <b>All<br/>(N=396)</b>   | <b>Ticagrelor<br/>(N=218)</b>   | <b>Prasugrel<br/>(N=178)</b>   | <b>p value</b> |
| <b>Therapy after discontinuation of study drug</b>         |                          |                                 |                                |                |
| <i>Ticagrelor ††</i>                                       | 13 (3.3)                 | 0 (0.0)                         | 13 (7.3)                       | <0.001         |
| <i>Prasugrel ***</i>                                       | 35 (8.8)                 | 35 (16.1)                       | 0 (0.0)                        | <0.001         |
| <i>Clopidogrel</i>                                         | 216 (54.5)               | 115 (52.8)                      | 101 (56.7)                     | 0.489          |
| <i>Oral anticoagulation</i>                                | 78 (19.7)                | 38 (17.4)                       | 40 (22.5)                      | 0.259          |
| <i>None of the aforementioned medication</i>               | 111 (28.0)               | 59 (27.1)                       | 52 (29.2)                      | 0.718          |

Data are shown as counts (%). \* Not available for patients who withdrew consent before discharge. \*\* Percentages refer to patients who discontinued the study drugs during follow-up. † Shown for patients discharged alive, not available for patients who withdrew consent. †† Of 13 patients who switched from prasugrel to ticagrelor, 2 switched due to allergy, 8 due to decision of the attending physician, 1 due to Dyspnoea and 2 due to unspecific side effects to medication. \*\*\* Of 35 patients who switched from ticagrelor to prasugrel, 2 switched due to allergy, 2 due to bleeding, 1 due to Bradycardia, 8 due to decision of the attending physician, 17 due to Dyspnoea, 1 due to incompliance and 4 due to unspecific side effects to medication. ACE=angiotensin-converting enzyme; ARB=angiotensin receptor blocker; NSTEMI=non-ST-segment elevation myocardial infarction; STEMI=ST-segment elevation myocardial infarction.

**Supplemental Table 3. Baseline, angiographic characteristics and drug therapy at discharge in patients treated conservatively as per assigned antiplatelet therapy.**

|                                                 | All<br>(N=553) | Ticagrelor<br>(N= 285) | Prasugrel<br>(N= 268) | p value |
|-------------------------------------------------|----------------|------------------------|-----------------------|---------|
| <b>Baseline characteristics</b>                 |                |                        |                       |         |
| <b>Age (years)</b>                              | 64.5 ± 12.7    | 64.9 ± 12.8            | 64.2 ± 12.5           | 0.502   |
| <b>Sex</b>                                      |                |                        |                       | 0.734   |
| <i>Women</i>                                    | 230 (41.6)     | 121 (42.5)             | 109 (40.7)            |         |
| <i>Men</i>                                      | 323 (58.4)     | 164 (57.5)             | 159 (59.3)            |         |
| <b>Diabetes</b>                                 | 120 (21.7)     | 69 (24.2)              | 51 (19.0)             | 0.169   |
| <i>On insulin therapy</i>                       | 34 (6.2)       | 21 (7.4)               | 13 (4.9)              | 0.292   |
| <b>Current smoker</b>                           | 129/551 (23.4) | 77/283 (27.2)          | 52 (19.4)             | 0.003   |
| <b>Arterial hypertension</b>                    | 419 (75.8)     | 213 (74.7)             | 206 (76.9)            | 0.628   |
| <b>Hypercholesterolemia</b>                     | 343/551 (62.3) | 171/284 (60.2)         | 172/267 (64.4)        | 0.352   |
| <b>Prior myocardial infarction</b>              | 95/552 (17.2)  | 41/284 (14.4)          | 54 (20.1)             | 0.096   |
| <b>Prior percutaneous coronary intervention</b> | 154 (27.8)     | 72 (25.3)              | 82 (30.6)             | 0.192   |
| <b>Prior coronary artery bypass grafting</b>    | 41 (7.4)       | 19 (6.7)               | 22 (8.2)              | 0.597   |
| <b>Cardiogenic shock</b>                        | 2 (0.4)        | 1 (0.4)                | 1 (0.4)               | 1.000   |
| <b>Systolic blood pressure (mmHg)</b>           | 144 ± 23.3     | 144 ± 23.5             | 144 ± 23.2            | 0.897   |
| <b>Diastolic blood pressure (mmHg)</b>          | 81.1 ± 13.7    | 81.0 ± 14.5            | 81.1 ± 12.7           | 0.912   |
| <b>Heart rate (beats/min)</b>                   | 76.9 ± 16.8    | 77.3 ± 17.8            | 76.6 ± 15.7           | 0.631   |
| <b>Body mass index (kg/m<sup>2</sup>)</b>       | 27.8 ± 4.8     | 27.6 ± 4.8             | 28.0 ± 4.8            | 0.351   |
| <b>Body weight &lt; 60 kg</b>                   | 46/552 (8.3)   | 25/284 (8.8)           | 21 (7.8)              | 0.797   |
| <b>Creatinine (µmol/L)</b>                      | 88.2 ± 32.1    | 87.7 ± 30.7            | 88.7 ± 33.5           | 0.716   |
| <b>Diagnosis at admission</b>                   |                |                        |                       | 0.062   |
| <i>Unstable angina</i>                          | 209 (37.8)     | 99 (34.7)              | 110 (41.0)            |         |
| <i>NSTEMI</i>                                   | 268 (48.5)     | 138 (48.4)             | 130 (48.5)            |         |
| <i>STEMI</i>                                    | 76 (13.7)      | 48 (16.8)              | 28 (10.4)             |         |
| <b>Coronary angiography</b>                     | 545 (98.6)     | 281 (98.6)             | 264 (98.5)            | 1.000   |
| <b>Ticagrelor loading</b>                       | 269 (48.6)     | 269 (94.4)             | 0 (0.0)               | <0.001  |

|                                                            |                |                |                |        |
|------------------------------------------------------------|----------------|----------------|----------------|--------|
| <b>Prasugrel loading</b>                                   | 56 (10.1)      | 0 (0.0)        | 56 (20.9)      | <0.001 |
| <b>Angiographic characteristics</b>                        |                |                |                |        |
| <b>Access site</b>                                         |                |                |                | 0.260  |
| <i>Femoral artery</i>                                      | 332 (60.0)     | 164 (57.5)     | 168 (62.7)     |        |
| <i>Radial artery</i>                                       | 210 (38.0)     | 114 (40.0)     | 96 (35.8)      |        |
| <i>Other</i>                                               | 3 (0.5)        | 3 (1.1)        | 0 (0.0)        |        |
| <i>No coronary angiography</i>                             | 8 (1.5)        | 4 (1.4)        | 4 (1.5)        |        |
| <b>Number of diseased coronary arteries</b>                |                |                |                | 0.220  |
| <i>No obstructive coronary artery disease</i>              | 330/545 (60.6) | 169/281 (60.1) | 161/264 (61.0) |        |
| <i>One-vessel disease</i>                                  | 76/545 (13.9)  | 44/281 (15.7)  | 32/264 (12.1)  |        |
| <i>Two-vessel disease</i>                                  | 59/545 (10.8)  | 24/281 (8.5)   | 35/264 (13.3)  |        |
| <i>Three-vessel disease</i>                                | 80/545 (14.7)  | 44/281 (15.7)  | 36/264 (13.6)  |        |
| <b>Multivessel disease</b>                                 | 139/545 (25.5) | 68/281 (24.2)  | 71/264 (26.9)  | 0.533  |
| <b>Left ventricular ejection fraction</b>                  | 55.3 ± 10.9    | 55.1 ± 11.1    | 55.6 ± 10.7    | 0.595  |
| <b>Drug therapy at discharge*</b>                          |                |                |                |        |
| <b>Final diagnosis of acute coronary syndrome– no. (%)</b> |                |                |                | 0.739  |
| <i>Unstable angina</i>                                     | 81/196 (41.3)  | 46/114 (40.4)  | 35/82 (42.7)   |        |
| <i>NSTEMI</i>                                              | 97/196 (49.5)  | 56/114 (49.1)  | 41/82 (50.0)   |        |
| <i>STEMI</i>                                               | 18/196 (9.2)   | 12/114 (10.5)  | 6/82 (7.3)     |        |
| <b>Therapy at discharge – no. (%) †</b>                    |                |                |                |        |
| <i>Aspirin</i>                                             | 405/552 (73.4) | 211 (74.0)     | 194/267 (72.7) | 0.788  |
| <i>Ticagrelor</i>                                          | 59/552 (10.7)  | 58 (20.4)      | 1/267 (0.4)    | <0.001 |
| <i>Prasugrel</i>                                           | 45/552 (8.2)   | 0 (0.0)        | 45/267 (16.9)  | <0.001 |
| <i>Clopidogrel</i>                                         | 19/552 (3.4)   | 12 (4.2)       | 7/267 (2.6)    | 0.430  |
| <i>Oral anticoagulant drugs</i>                            | 34/552 (6.2)   | 15 (5.3)       | 19/267 (7.1)   | 0.467  |
| <i>Beta blocking agents</i>                                | 344/552 (62.3) | 172 (60.4)     | 172/267 (64.4) | 0.369  |
| <i>ACE inhibitor/ARB</i>                                   | 403/552 (73.0) | 207 (72.6)     | 196/267 (73.4) | 0.913  |
| <i>Statin</i>                                              | 402/552 (72.8) | 201 (70.5)     | 201/267 (75.3) | 0.246  |

Data are shown as mean ± standard deviation or counts (%). Completeness of continuous data: body-mass index was not available in 1 patient in the ticagrelor group; left ventricular ejection fraction was not available for 18 patients (10 in the ticagrelor group and 8 in the prasugrel group). The remaining continuous data were complete. \* Not available for patients who withdrew consent or didn't survive the hospital stay before discharge. ACE=angiotensin-converting enzyme; ARB=angiotensin receptor blocker; NSTEMI=non-ST-segment elevation myocardial infarction; STEMI=ST-segment elevation myocardial infarction.

**Supplemental Table 4. Clinical outcomes in patients treated conservatively as per assigned antiplatelet therapy.**

| <b>Characteristic</b>                                                 | <b>Ticagrelor<br/>(N=285)</b> | <b>Prasugrel<br/>(N=268)</b> | <b>Hazard Ratio<br/>(95% CI)</b> | <b>p value</b> |
|-----------------------------------------------------------------------|-------------------------------|------------------------------|----------------------------------|----------------|
| <b>Urgent revascularization</b>                                       | 8 (2.9)                       | 9 (3.5)                      | 0.79 [0.30-2.06]                 | 0.625          |
| <b>Composite of death, myocardial infarction, or stroke – no. (%)</b> | 17 (6.1)                      | 12 (4.6)                     | 1.30 [0.63-2.81]                 | 0.460          |
| <b>Death from any cause</b>                                           | 8 (2.9)                       | 6 (2.3)                      | 1.25 [0.43-3.66]                 | 0.682          |
| <b>Myocardial Infarction</b>                                          | 7 (2.5)                       | 5 (1.9)                      | 1.31 [0.41-4.20]                 | 0.650          |
| <b>Stroke</b>                                                         | 3 (1.1)                       | 2 (0.8)                      | 1.35 [0.23-8.09]                 | 0.741          |
| <b>BARC type 3 to 5 bleeding</b>                                      | 5 (1.8)                       | 9 (3.4)                      | 0.52 [0.17-1.55]                 | 0.241          |

Data are number of events with Kaplan-Meier estimates (%) or cumulative incidence (%) after accounting for competing risk at 12-month follow-up. BARC type 3 to 5 bleeding was evaluated in the intention-to-treat population. BARC=Bleeding Academic Research Consortium; CI=confidence interval.

**Supplemental Table 5. Clinical outcomes in patients as per assigned antiplatelet therapy using on-treatment analysis.**

| <b>Characteristic</b>                             | <b>Ticagrelor<br/>(N=285)</b> | <b>Prasugrel<br/>(N=268)</b> | <b>Hazard Ratio<br/>(95% CI)</b> | <b>p value</b> |
|---------------------------------------------------|-------------------------------|------------------------------|----------------------------------|----------------|
| <b>Urgent revascularization</b>                   | 108 (6.8)                     | 84 (5.2)                     | 1.34 [1.01-1.78]                 | 0.044          |
| <b>Urgent target vessel revascularization</b>     | 50 (3.2)                      | 48 (3.0)                     | 1.08 [0.73-1.61]                 | 0.694          |
| <b>Urgent non-target vessel revascularization</b> | 63 (4.0)                      | 38 (2.4)                     | 1.73 [1.16-2.59]                 | 0.008          |

Data are number of events with cumulative incidence (%) after accounting for competing risk at 12-month follow-up.

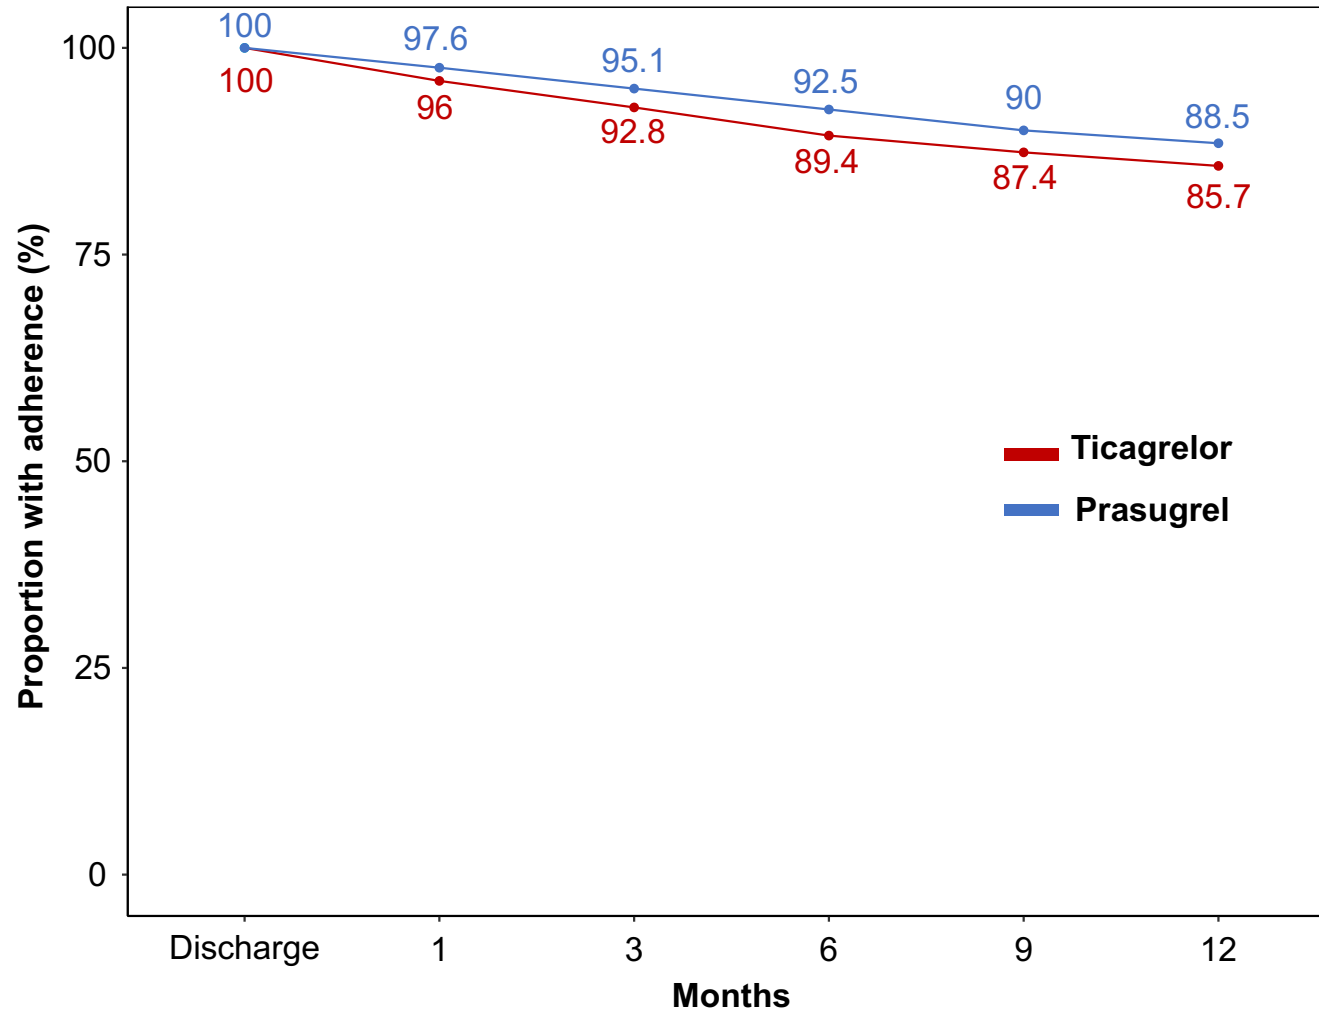

Supplemental Figure 1. Compliance with the assigned antiplatelet therapy at different time points of the follow-up.



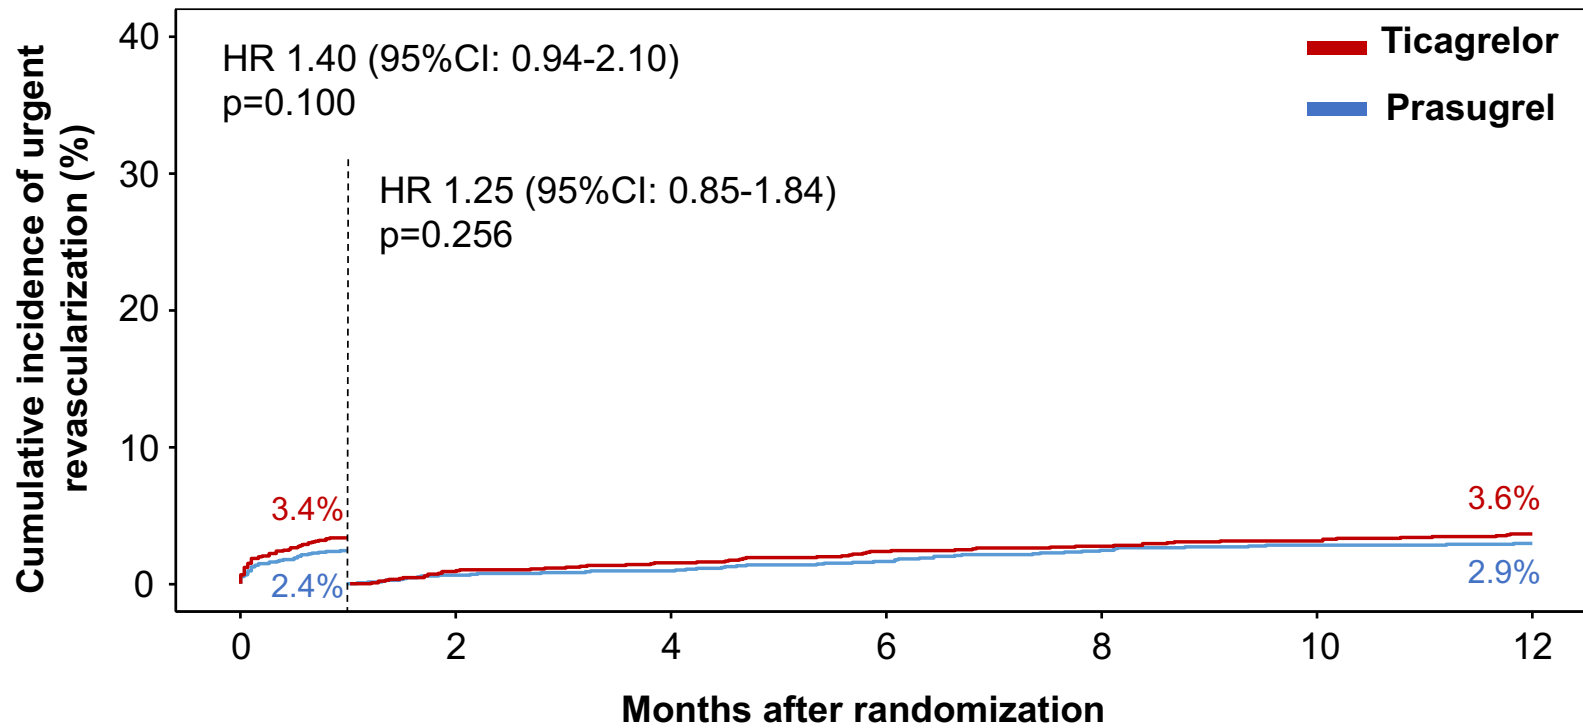

**Supplemental Figure 2. One-month landmark analysis of urgent revascularization following PCI.**

CI=confidence interval; HR=hazard ratio.
